# Supplementary material for: Dissection of the interaction between the intrinsically disordered YAP protein and the transcription factor TEAD
Source: PubMed Central journal article supplement (PMC5400505; doi:10.7554/elife.25068), 2017-04-21

Figure 4-source data 1 – hYAP Leu65 –  $\alpha$ -helix pocket

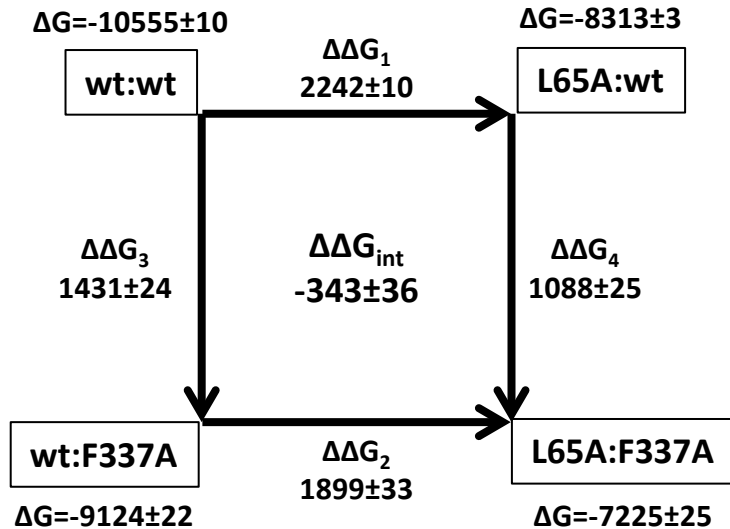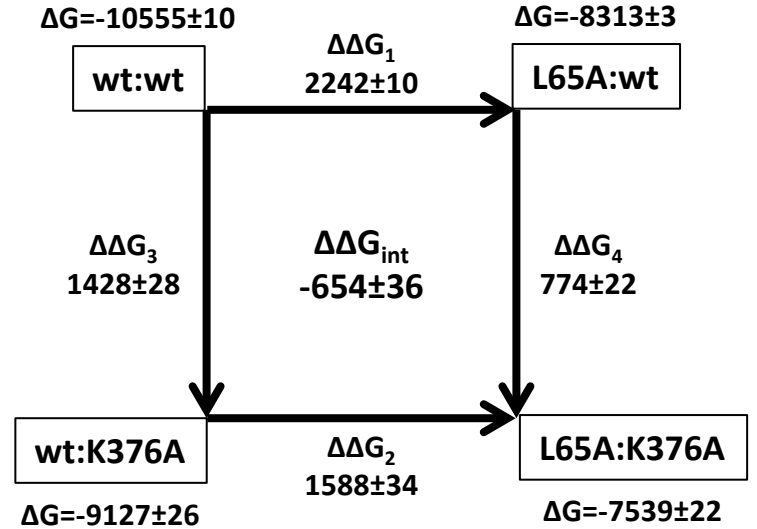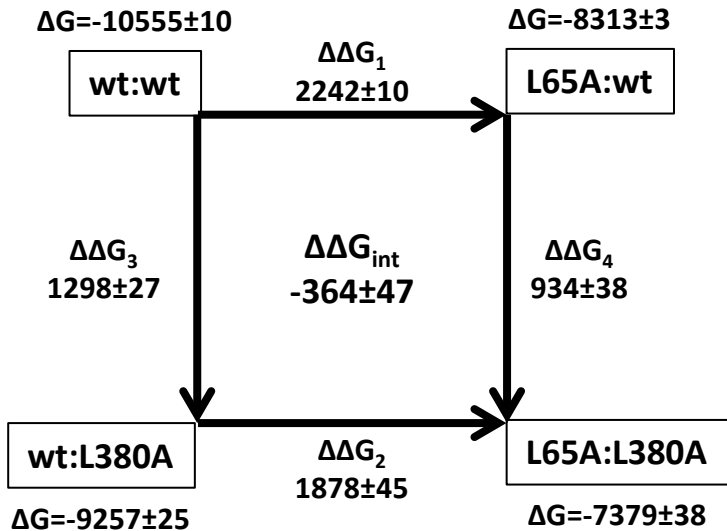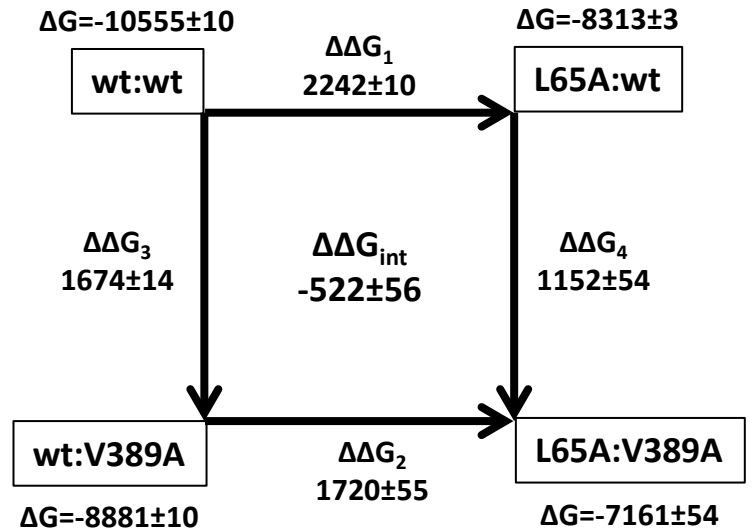

Figure 4-source data 1 – hYAP Leu65 –  $\Omega$ -loop pocket

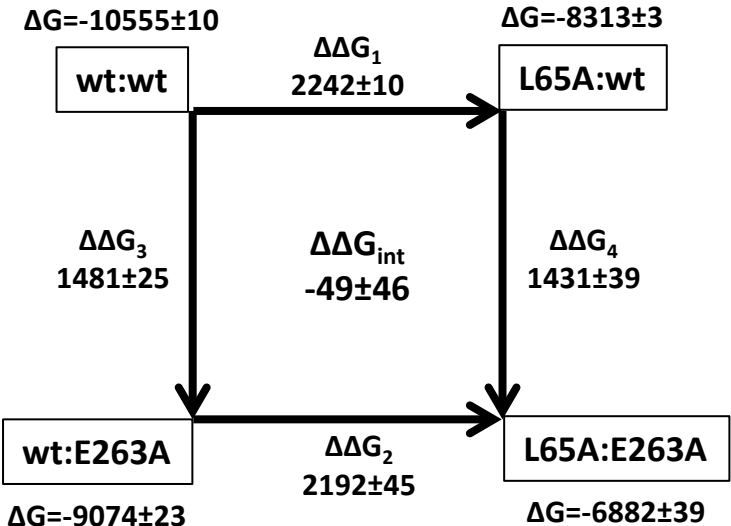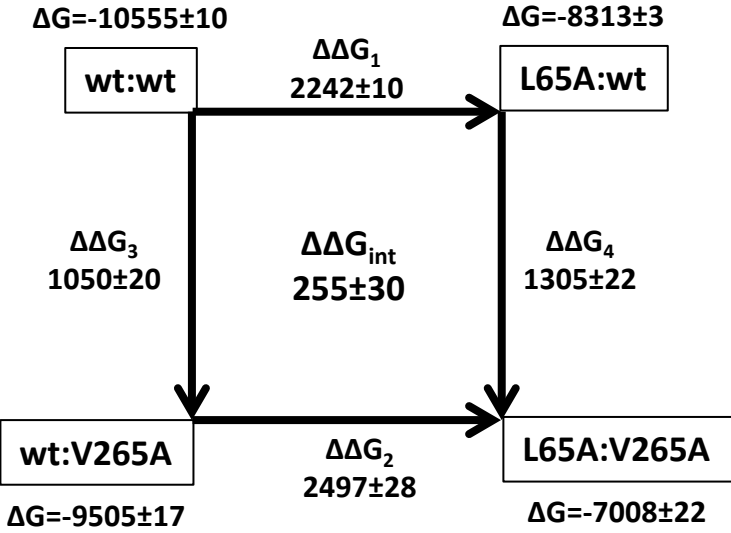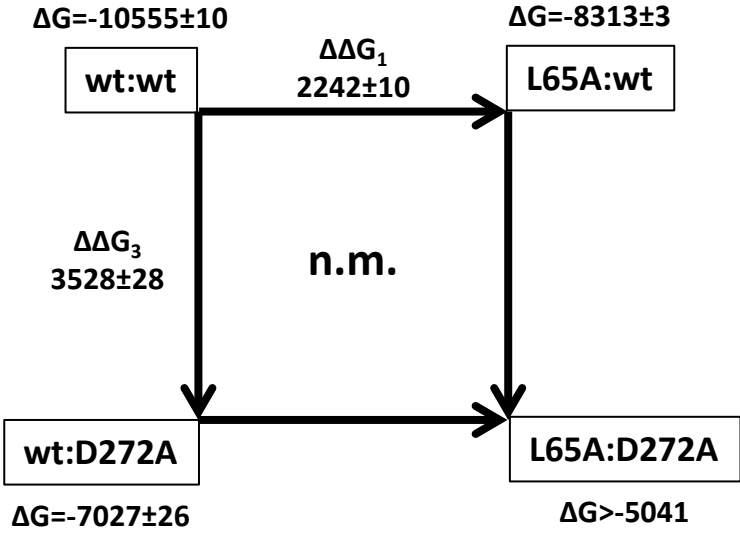

Figure 4-source data 1 – hYAP Leu68 –  $\alpha$ -helix pocket

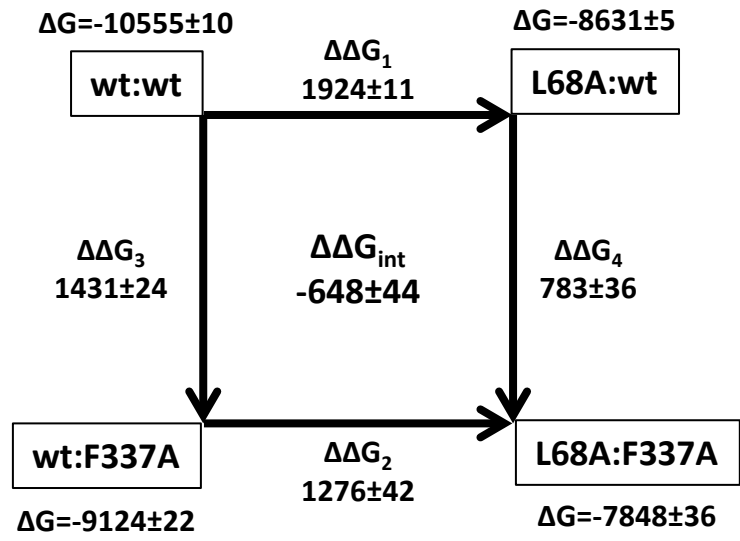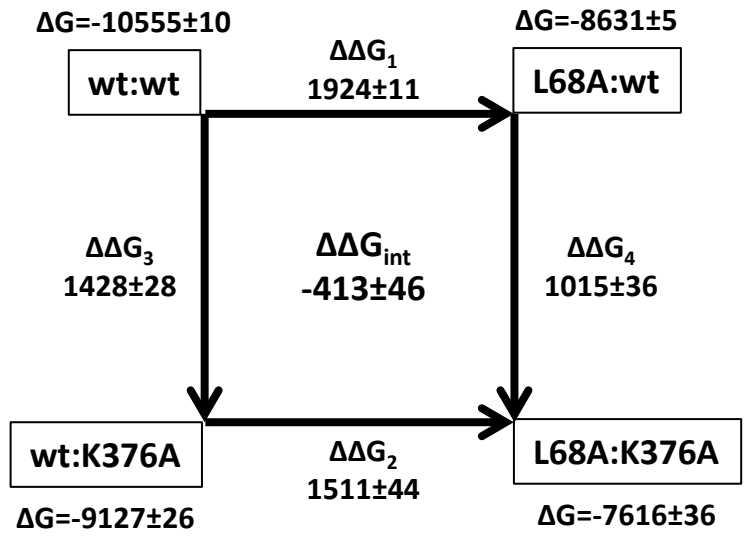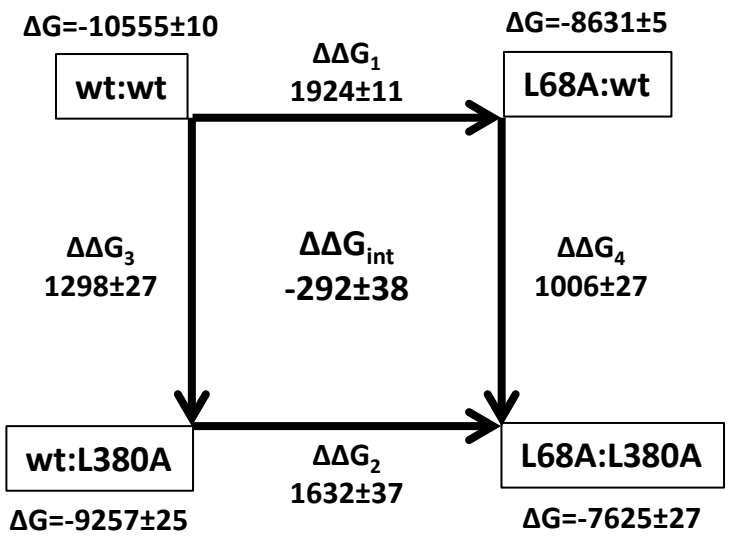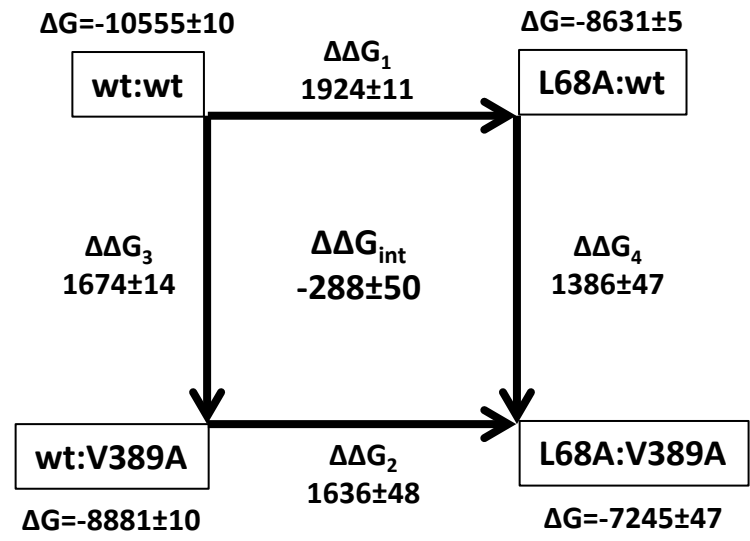

Figure 4-source data 1 – hYAP Leu68 –  $\Omega$ -loop pocket

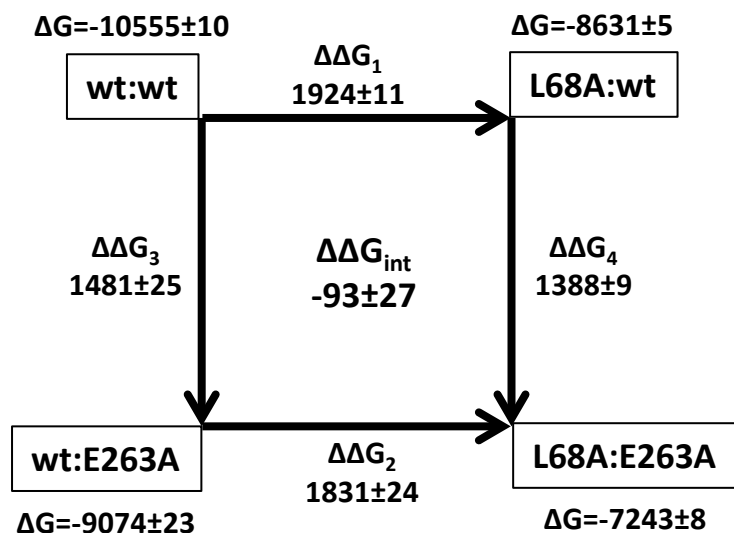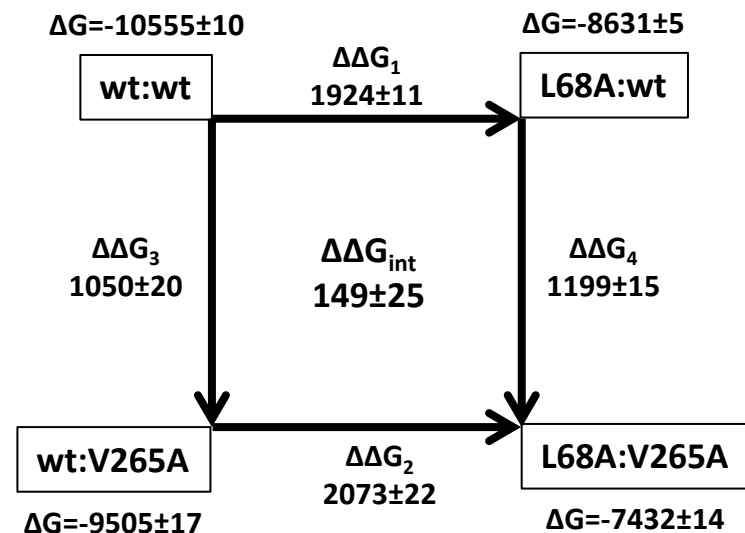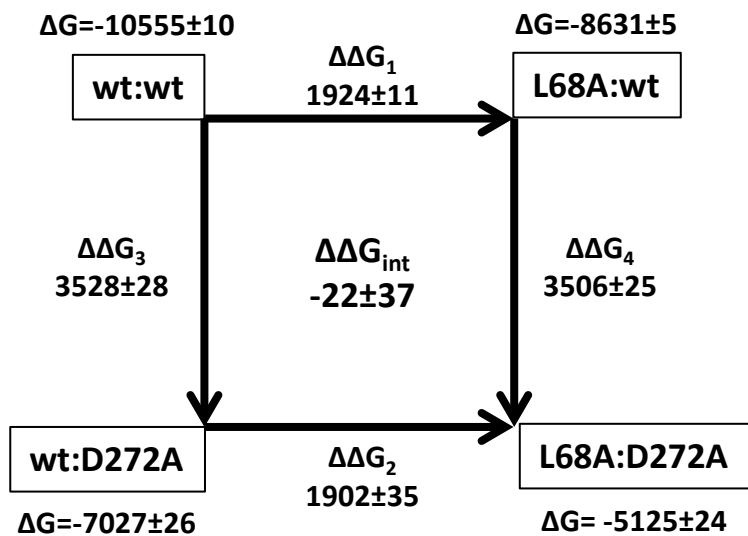

Figure 4-source data 1 – hYAP Phe69 –  $\alpha$ -helix pocket

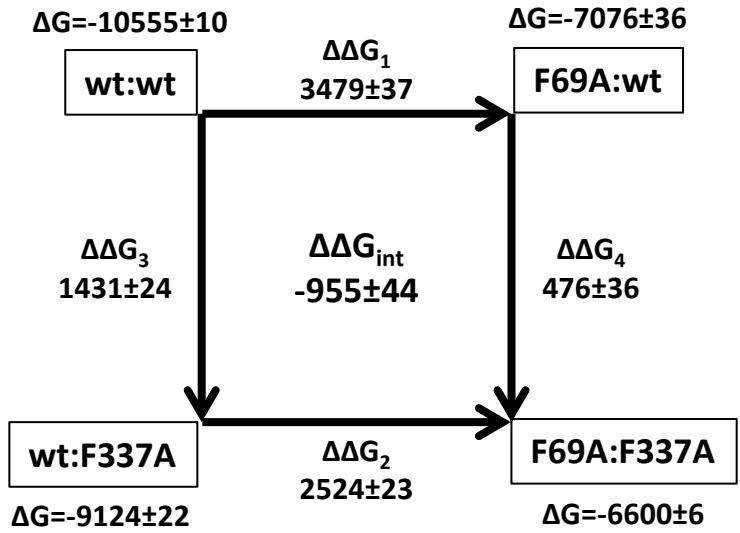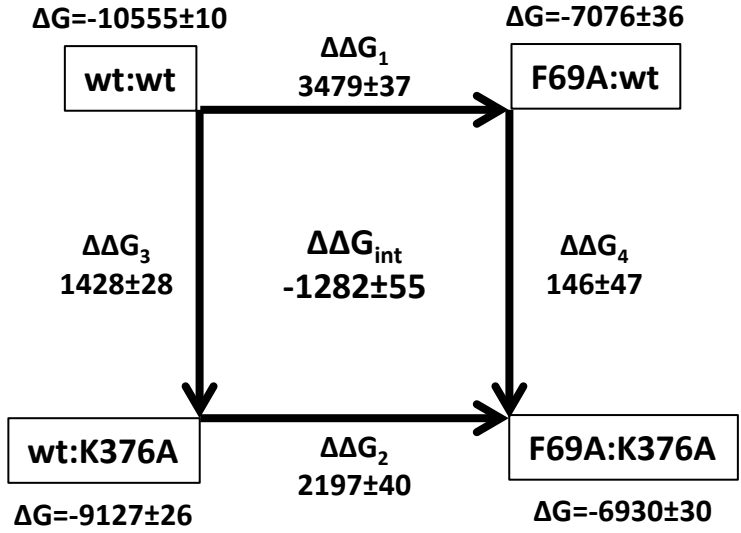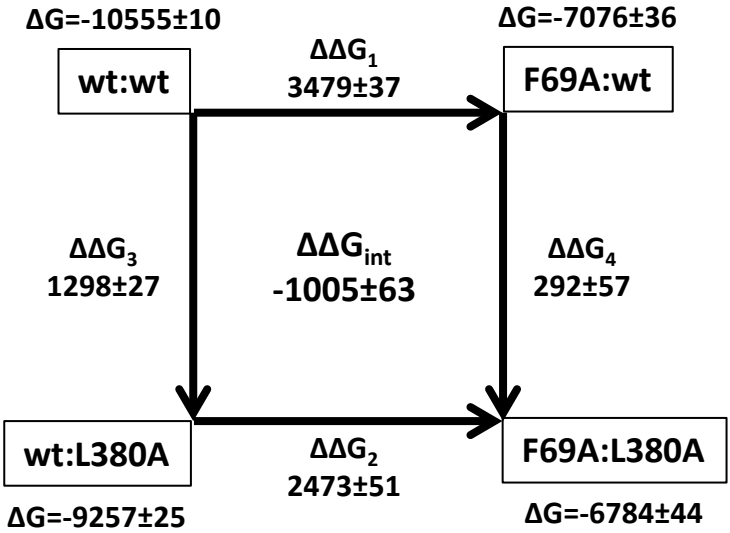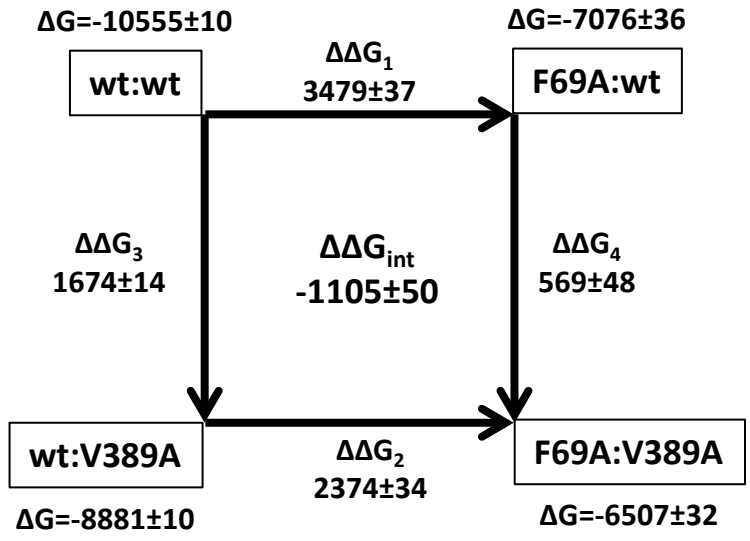

Figure 4-source data 1 – hYAP Phe69 – Ω-loop pocket

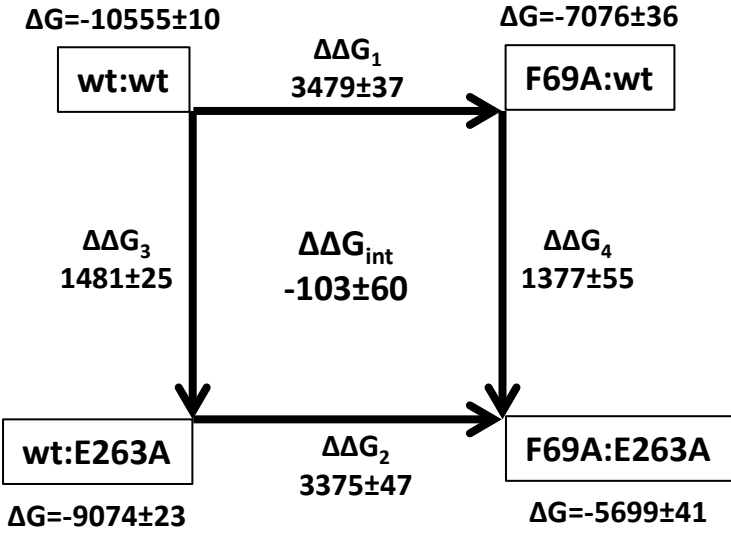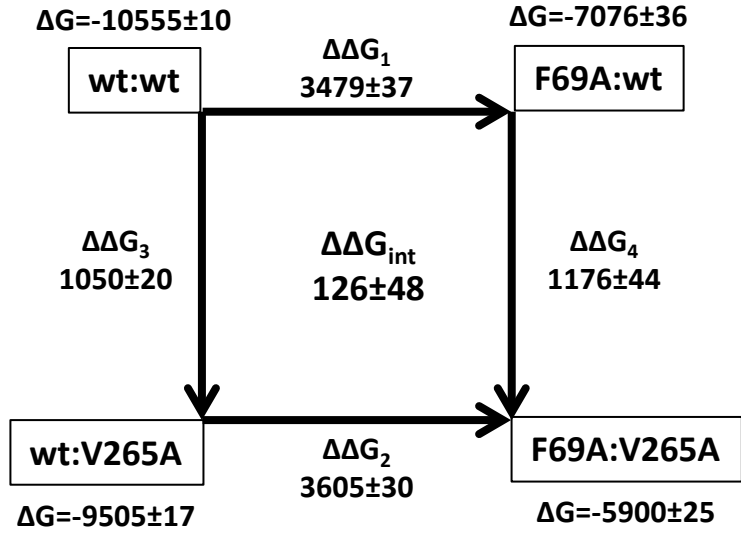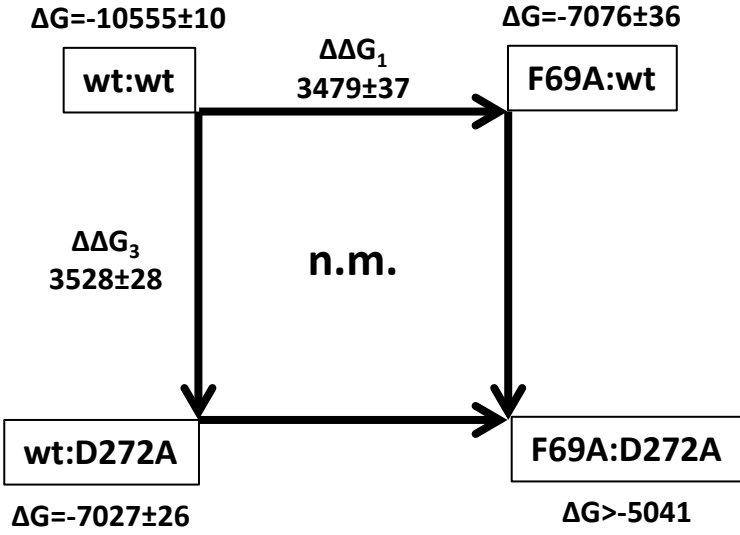

Figure 4-source data 1 – hYAP Met86 –  $\alpha$ -helix pocket

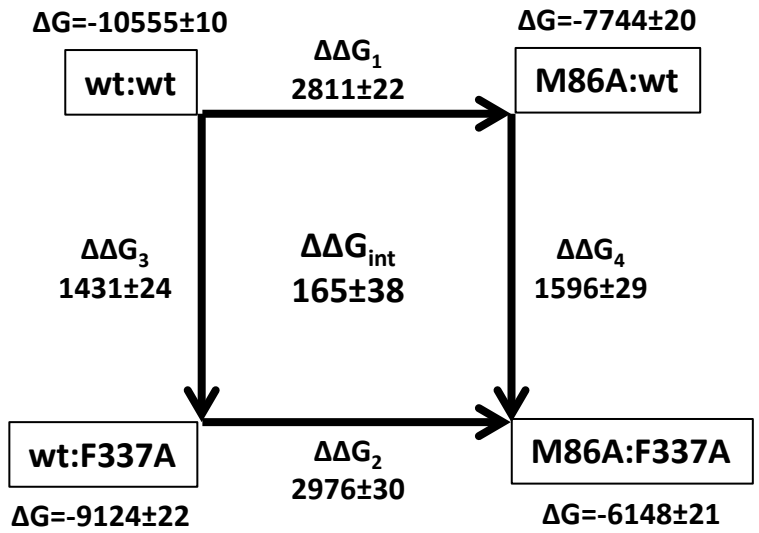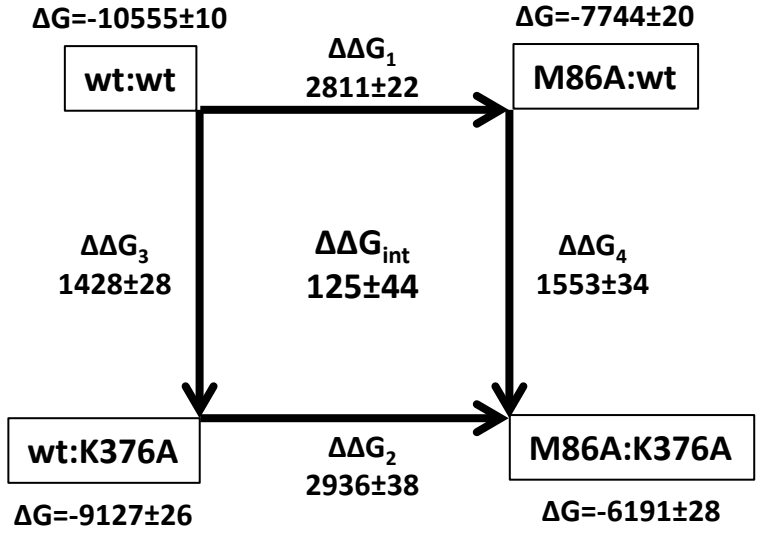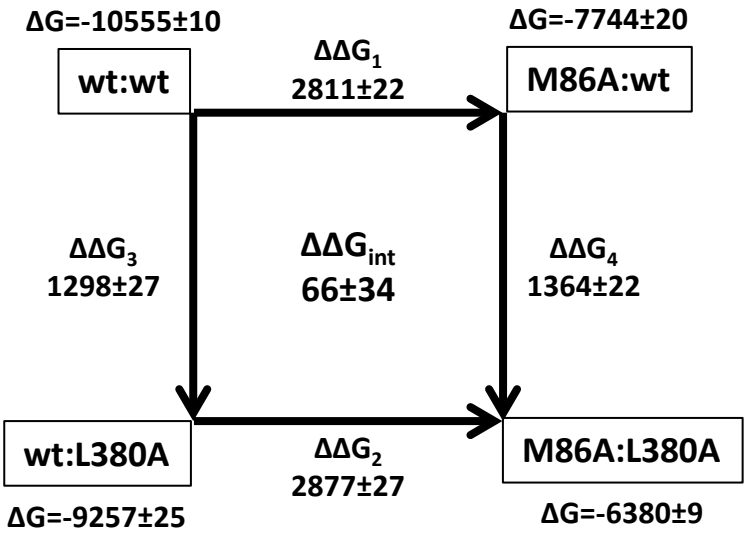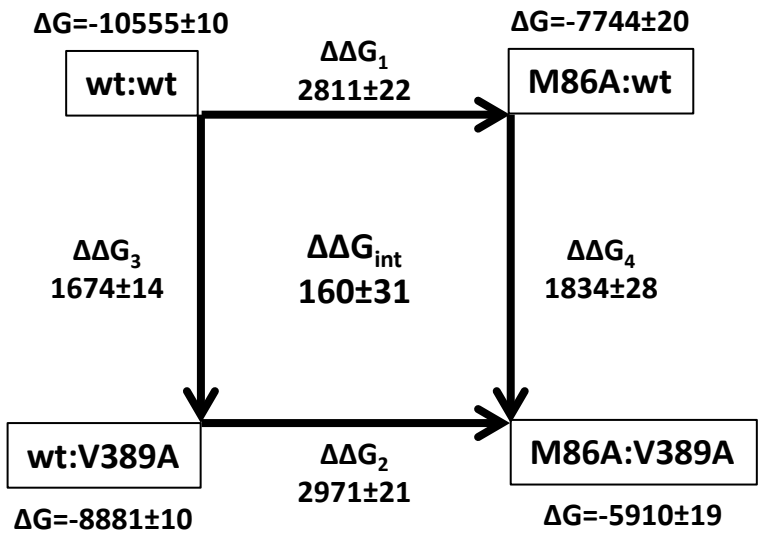

Figure 4-source data 1 – hYAP Met86 –  $\Omega$ -loop pocket

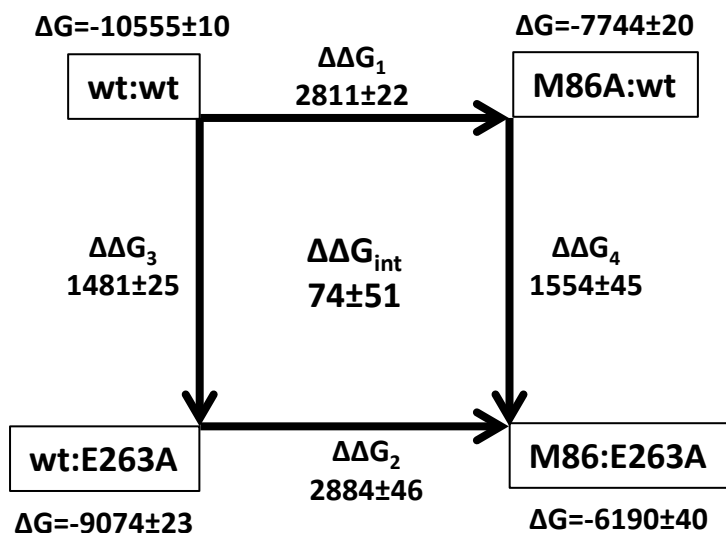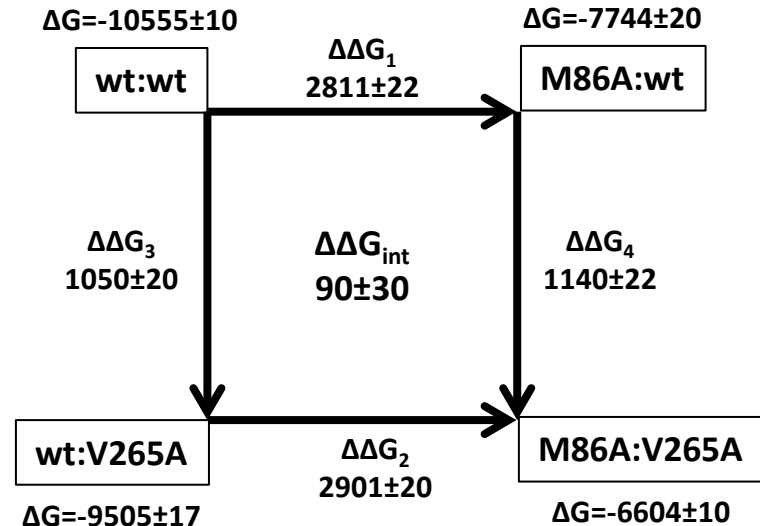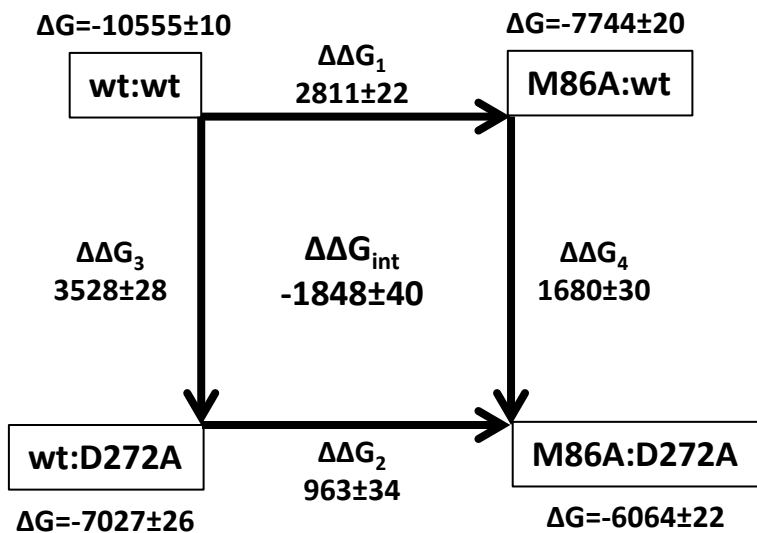



Figure 4-source data 1 – hYAP Arg89 –  $\alpha$ -helix pocket

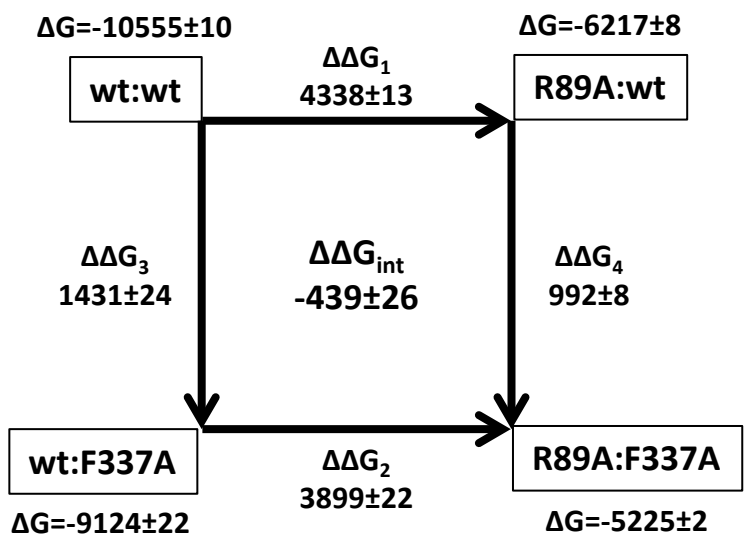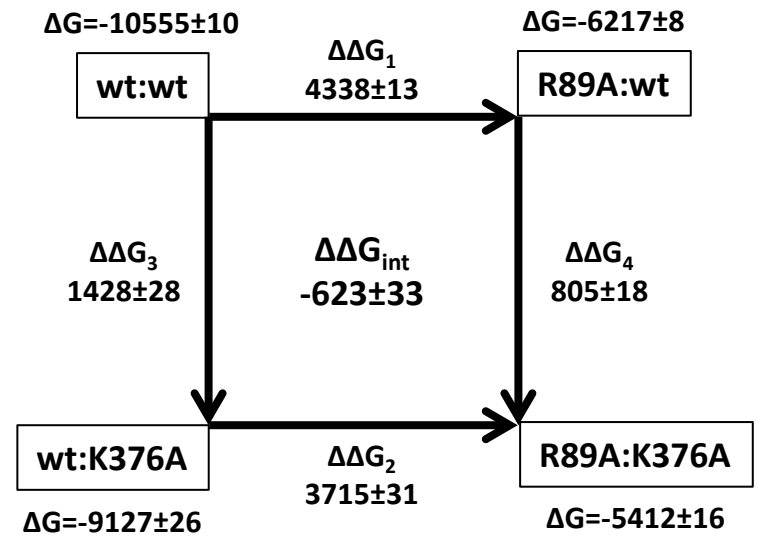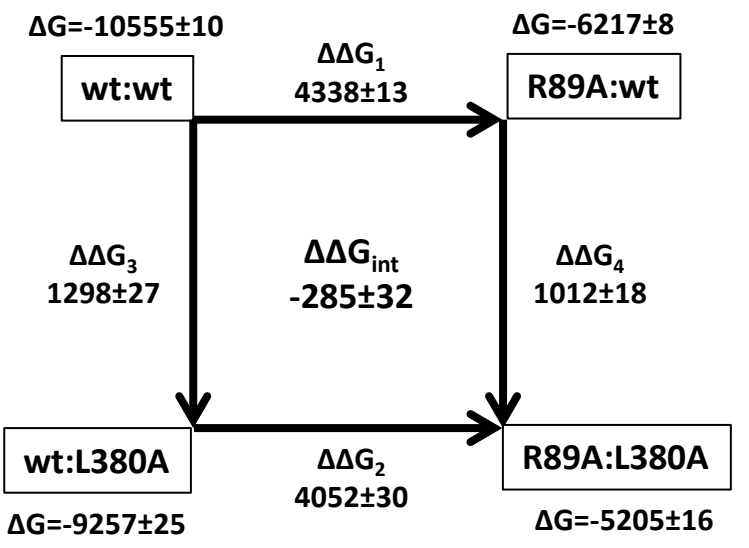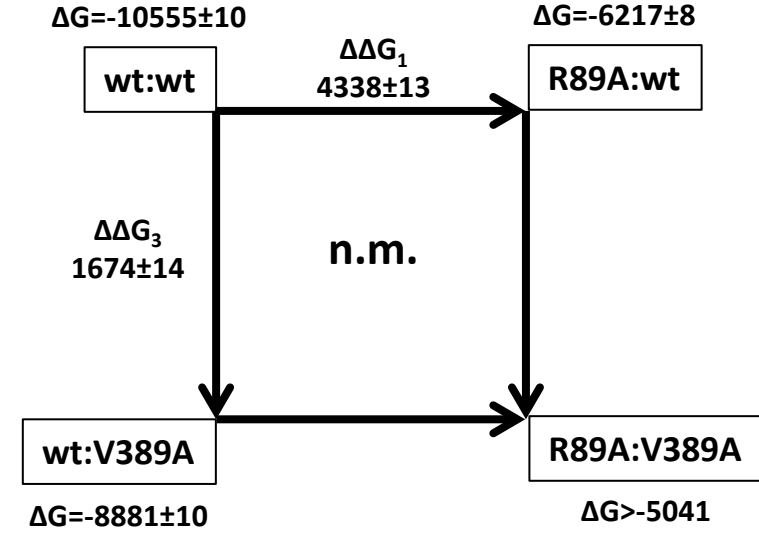

Figure 4-source data 1 – hYAP Arg89 – Ω-loop pocket

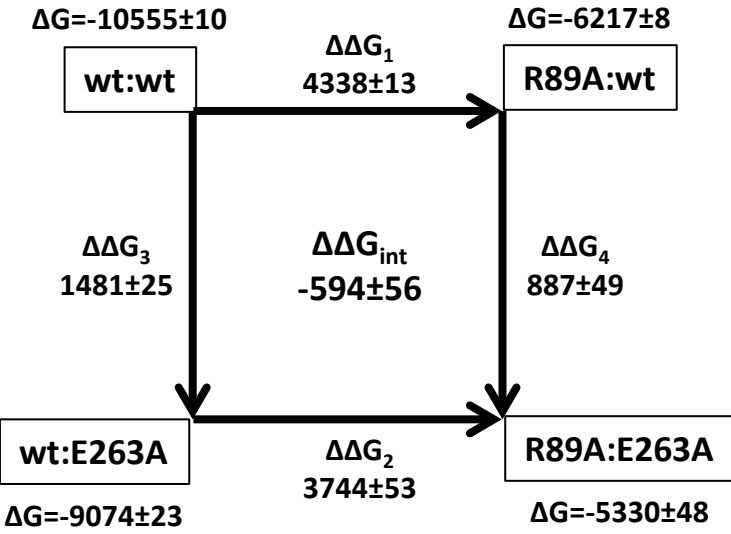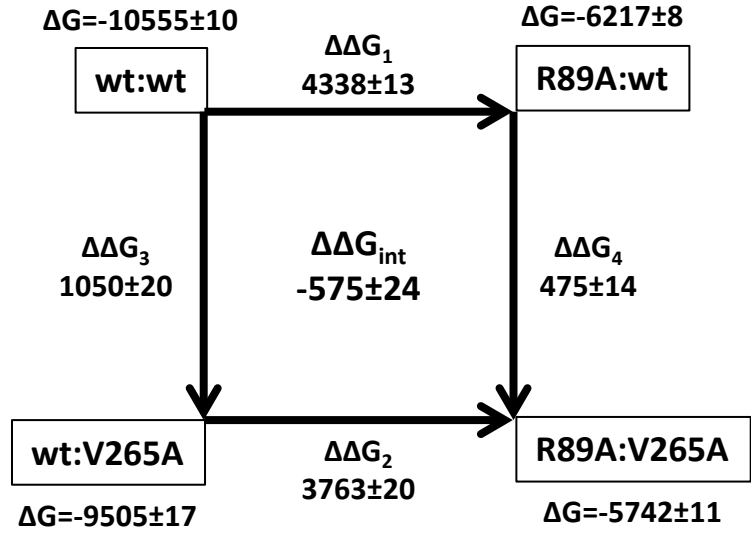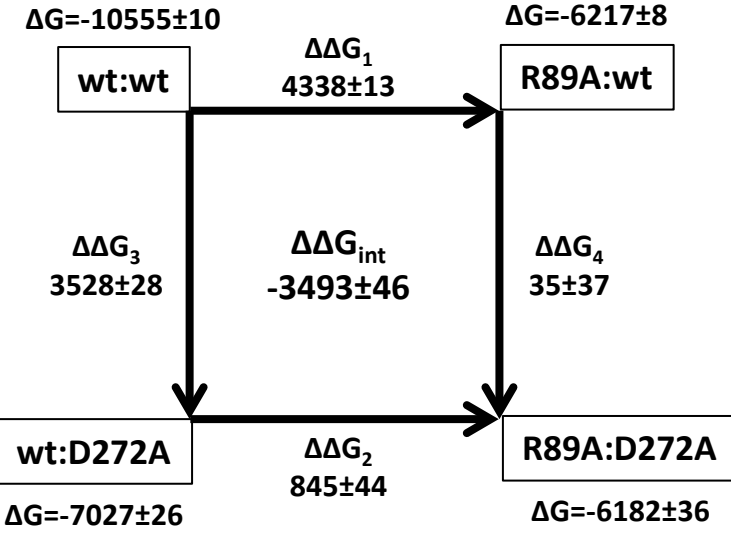

Figure 4-source data 1 – hYAP Leu91 –  $\alpha$ -helix pocket

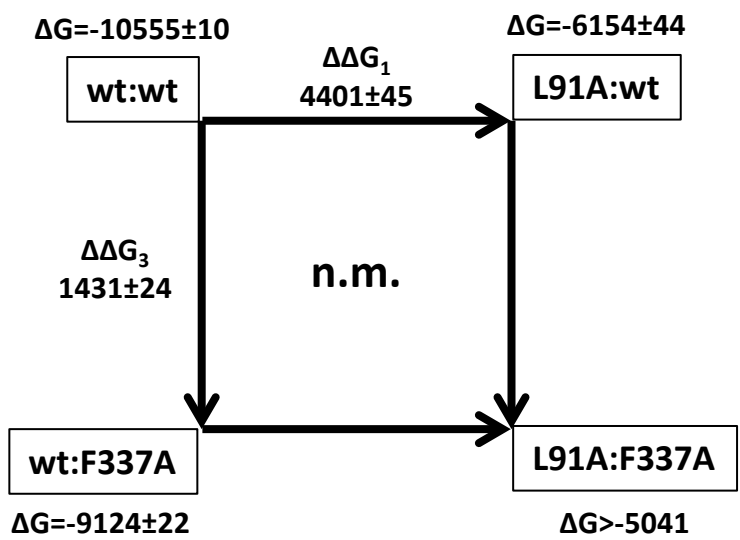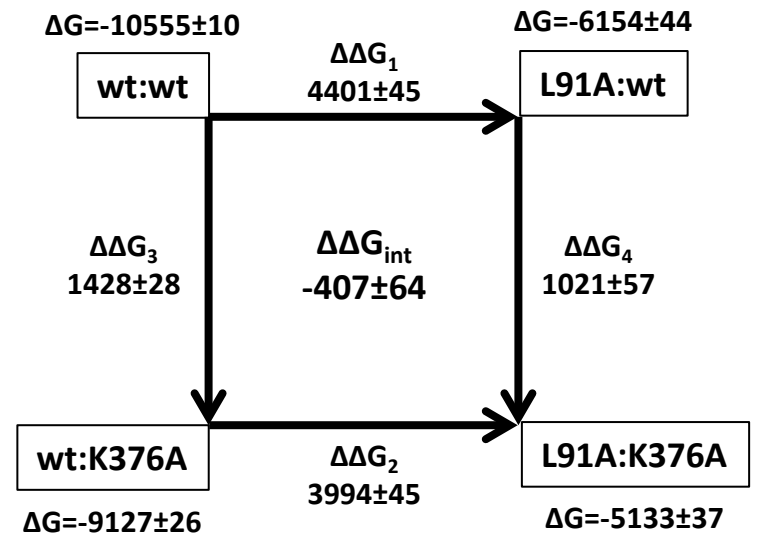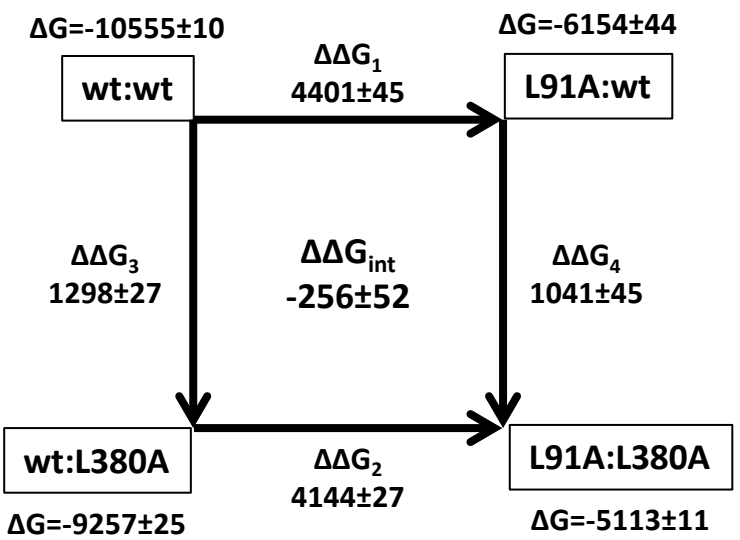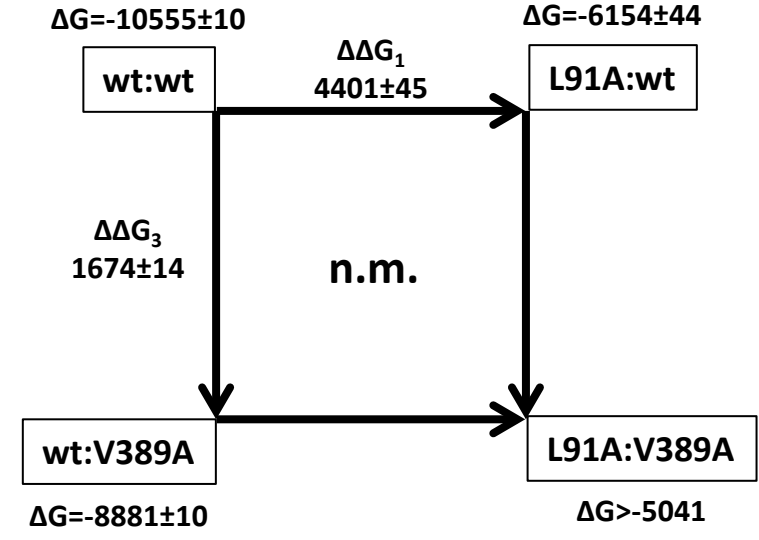

Figure 4-source data 1 – hYAP Leu91 – Ω-loop pocket

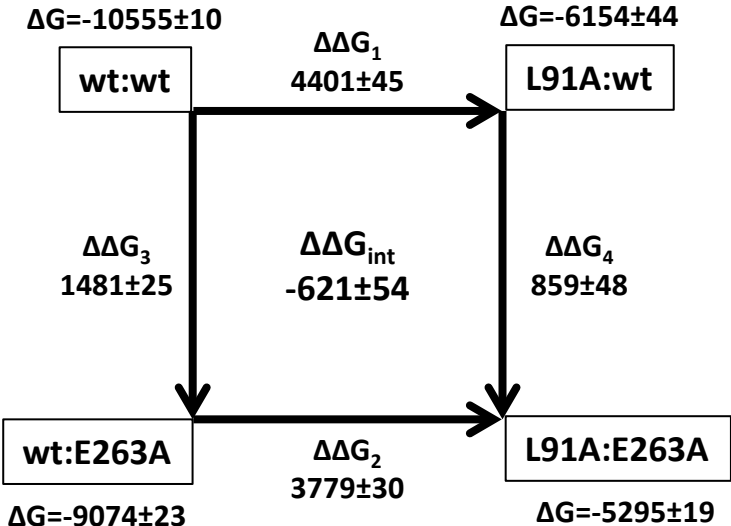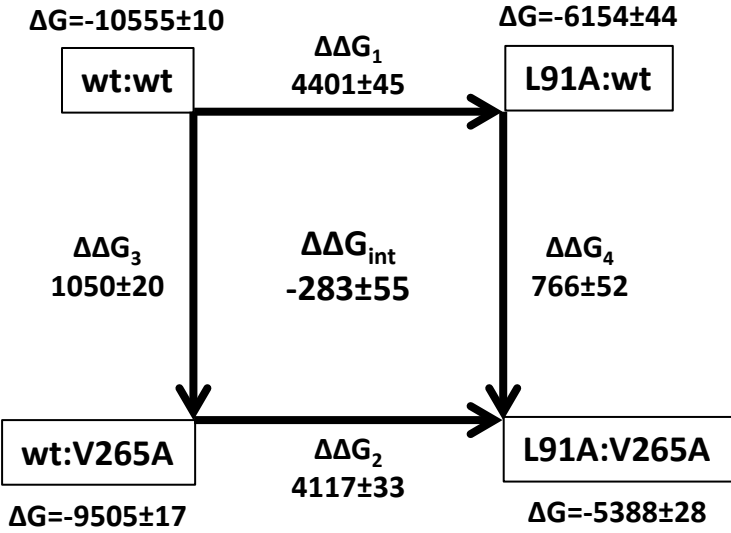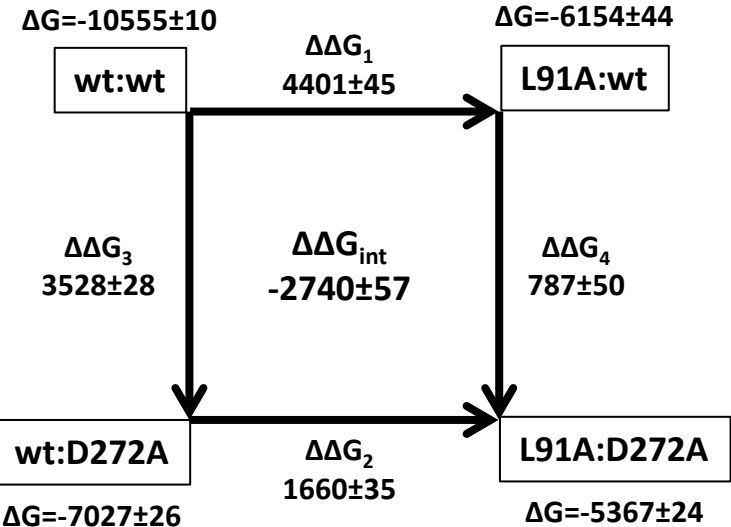

Figure 4-source data 1 – hYAP Ser94 –  $\alpha$ -helix pocket

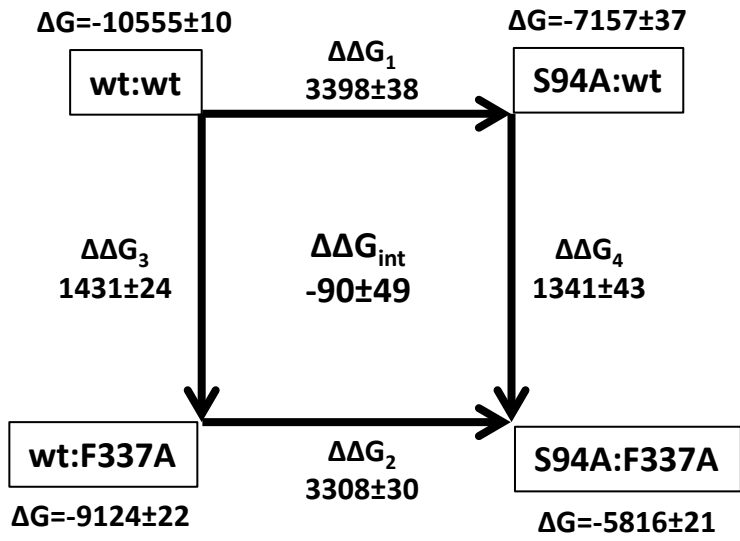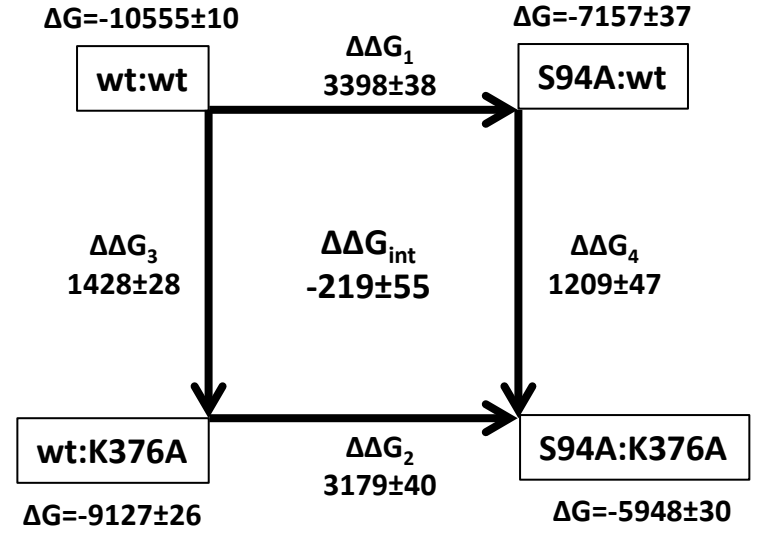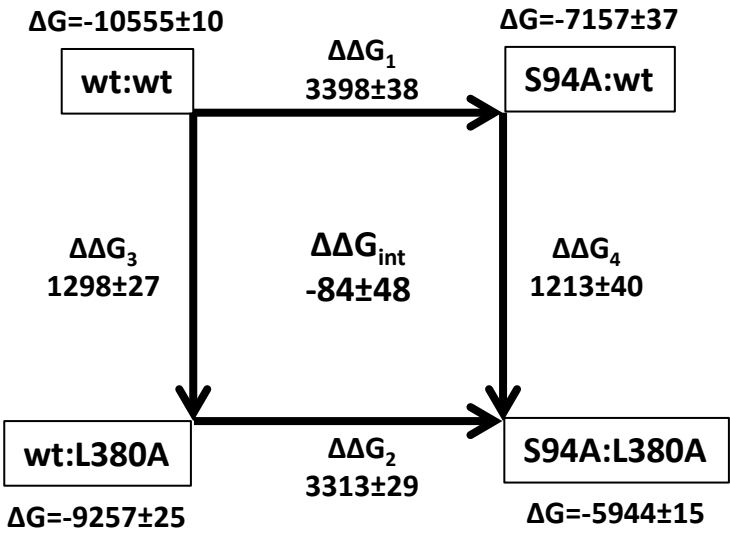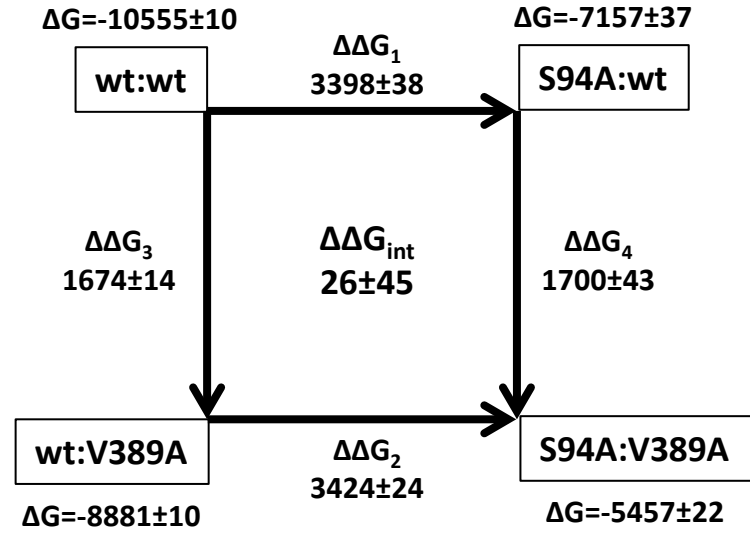

Figure 4-source data 1 – hYAP Ser94 –  $\Omega$ -loop pocket

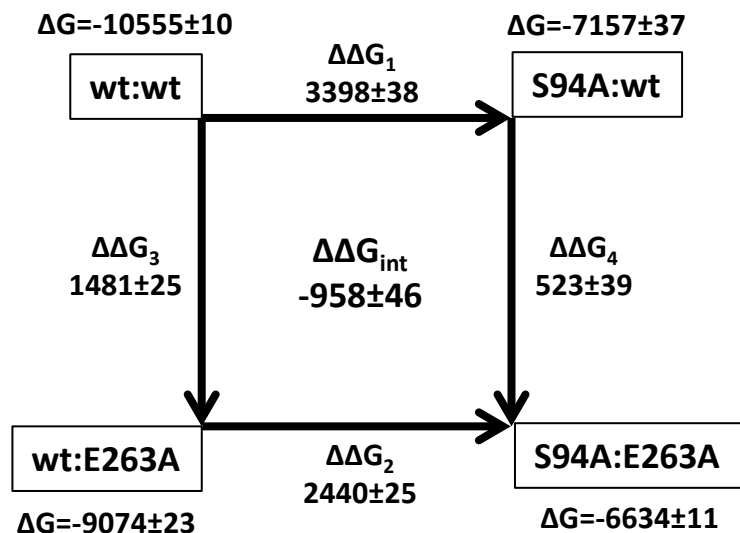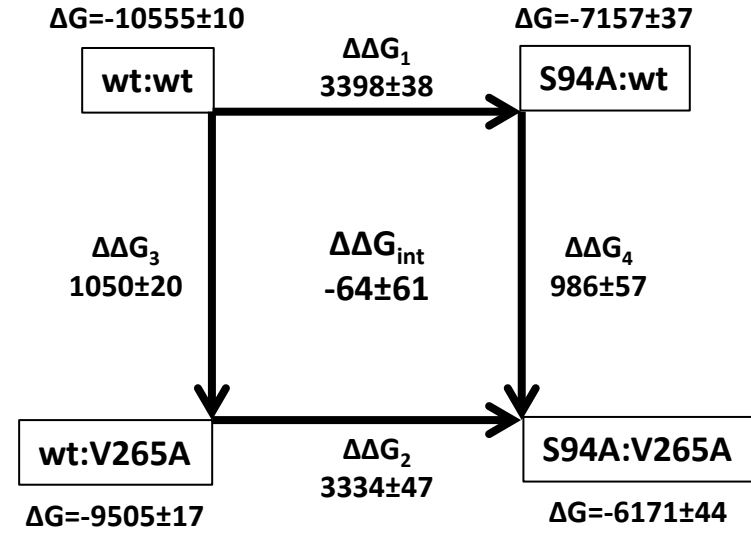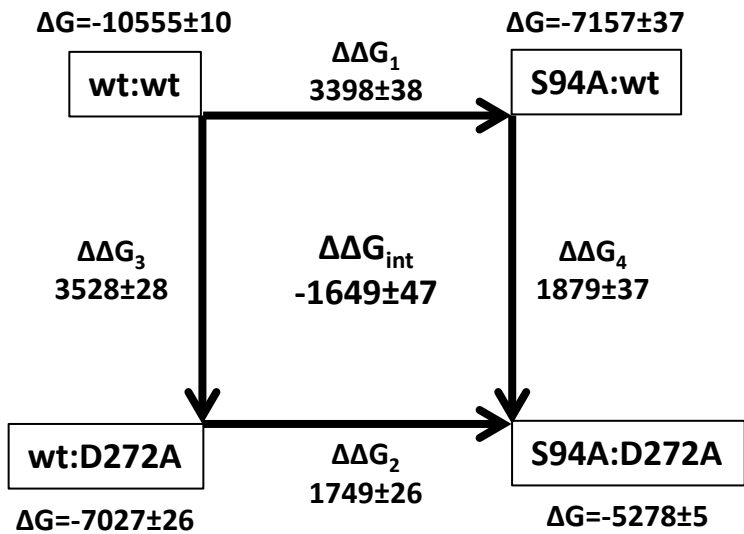

Figure 4-source data 1 – hYAP Phe95 –  $\alpha$ -helix pocket

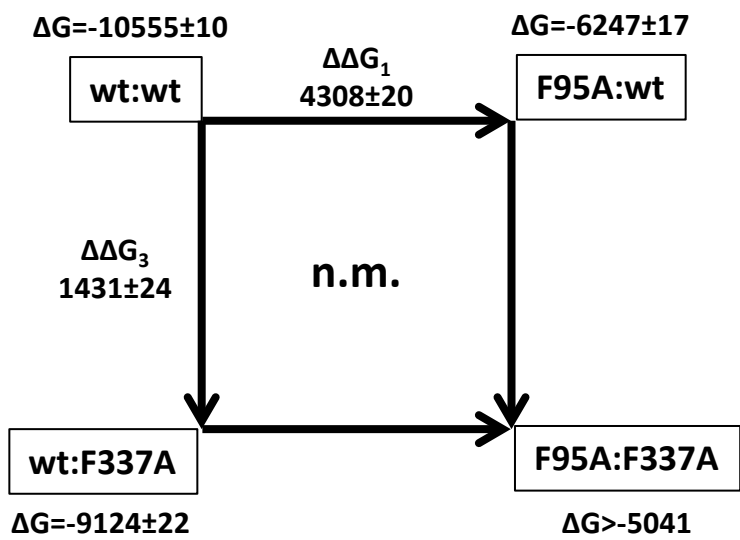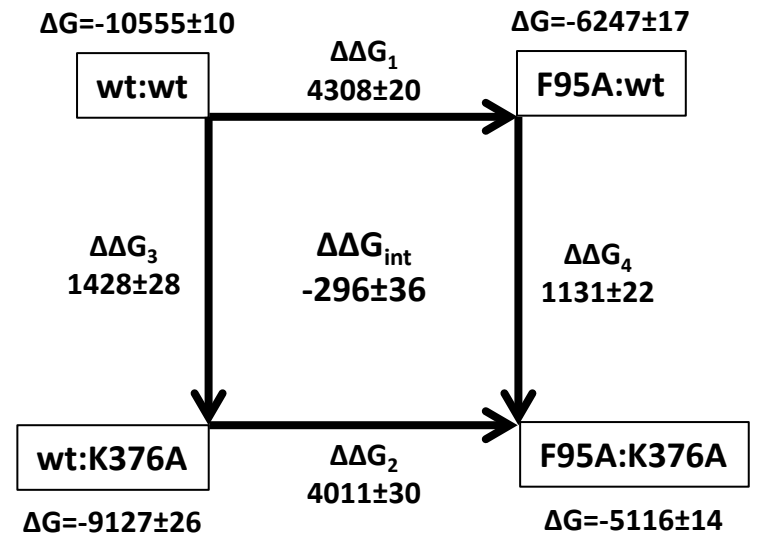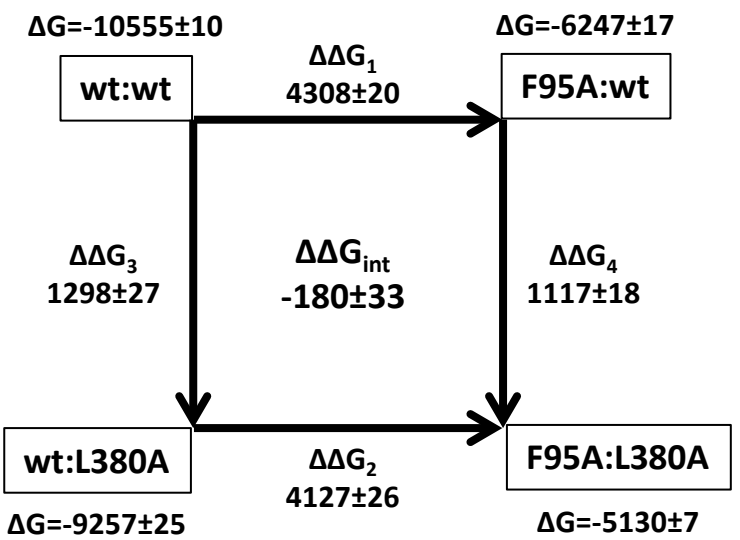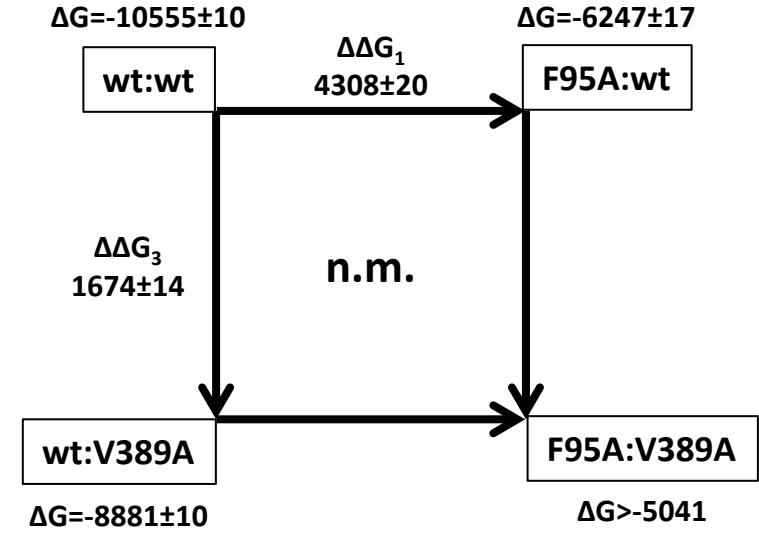

Figure 4-source data 1 – hYAP Phe95 –  $\Omega$ -loop pocket

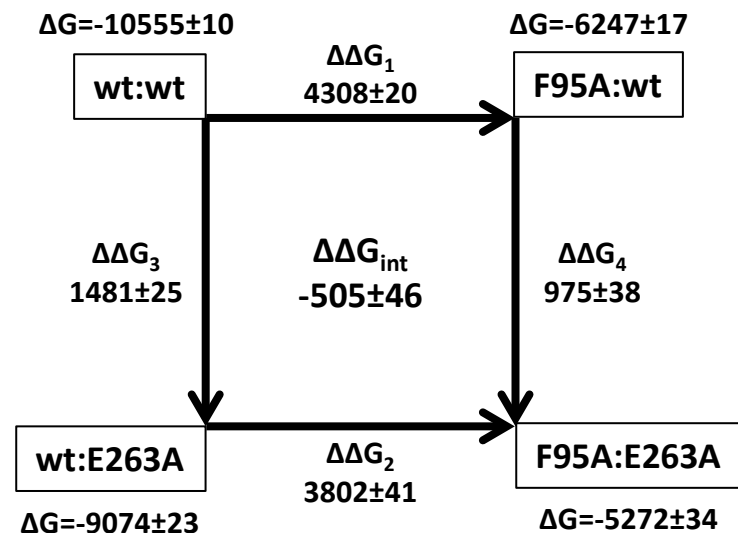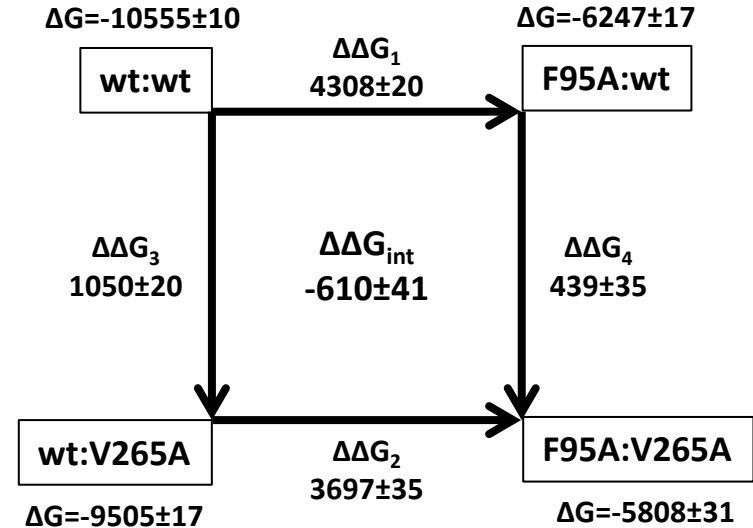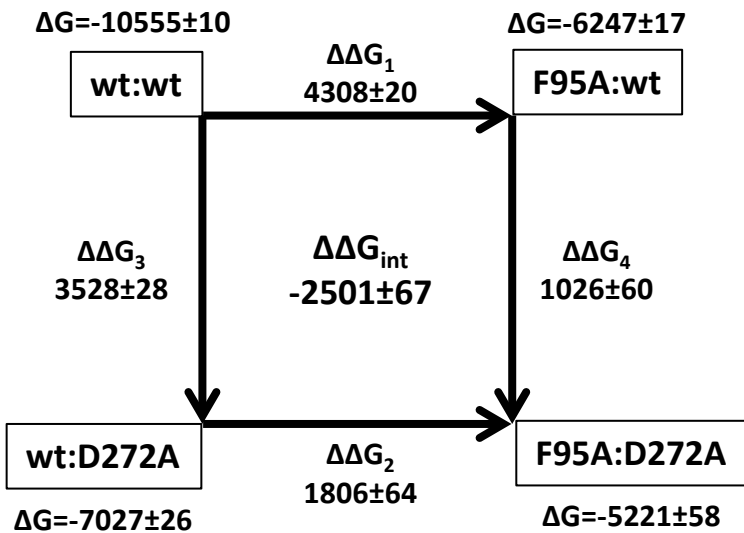



Figure 4-source data 1 – hYAP Phe96 –  $\alpha$ -helix pocket

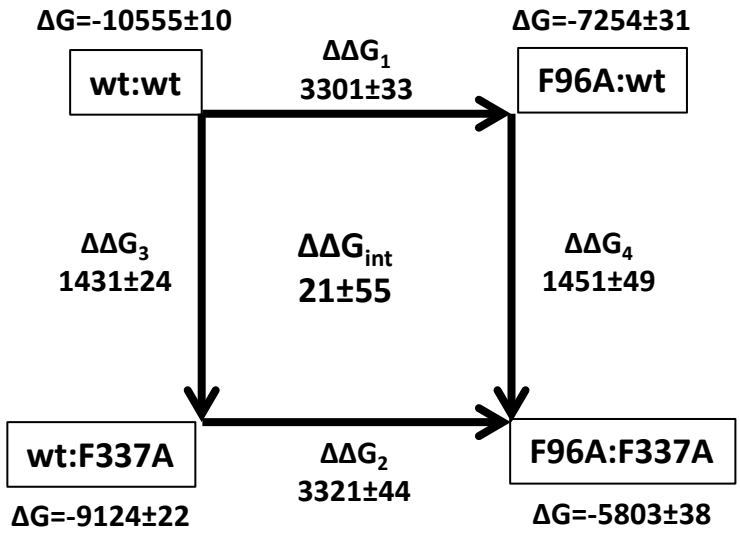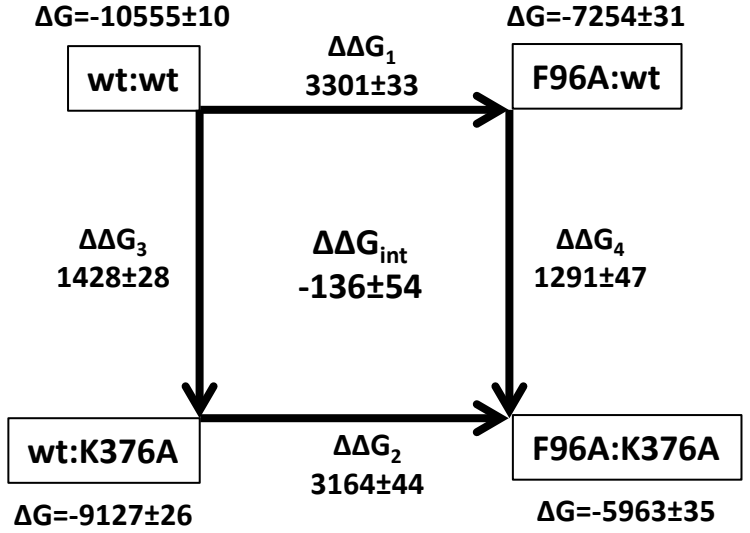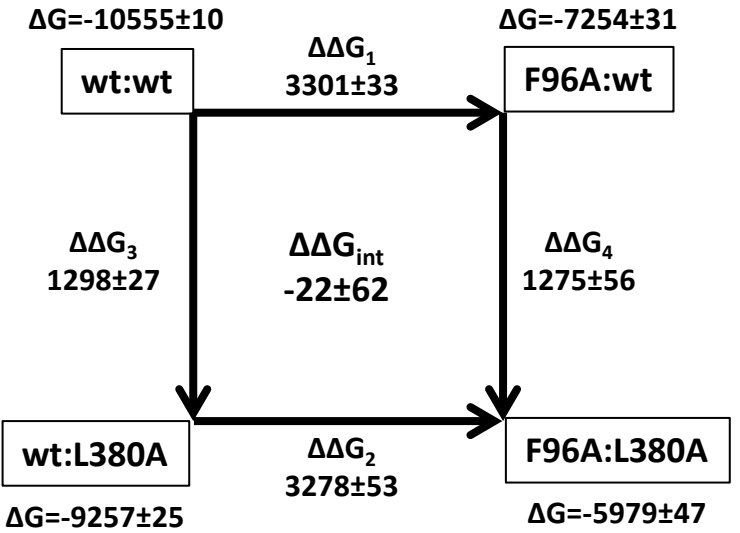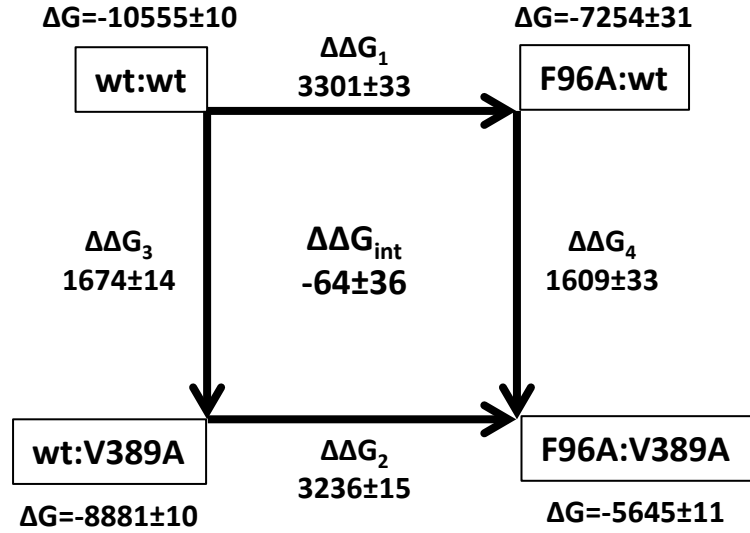

Figure 4-source data 1 – hYAP Phe96 – Ω-loop pocket

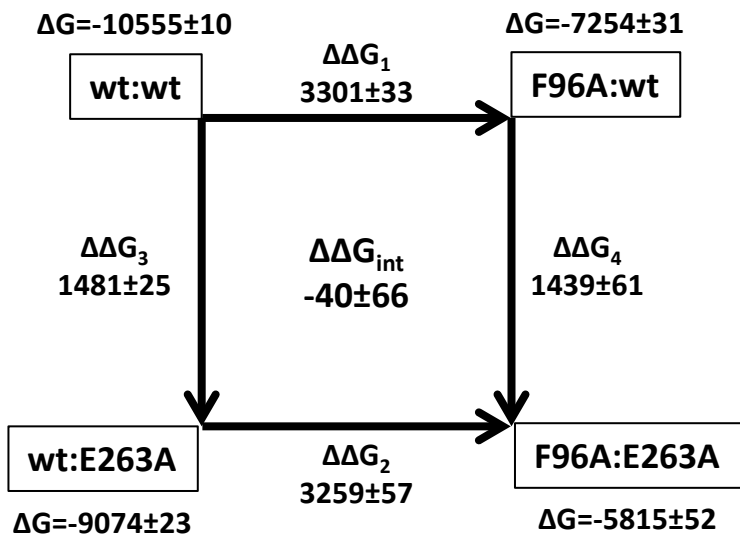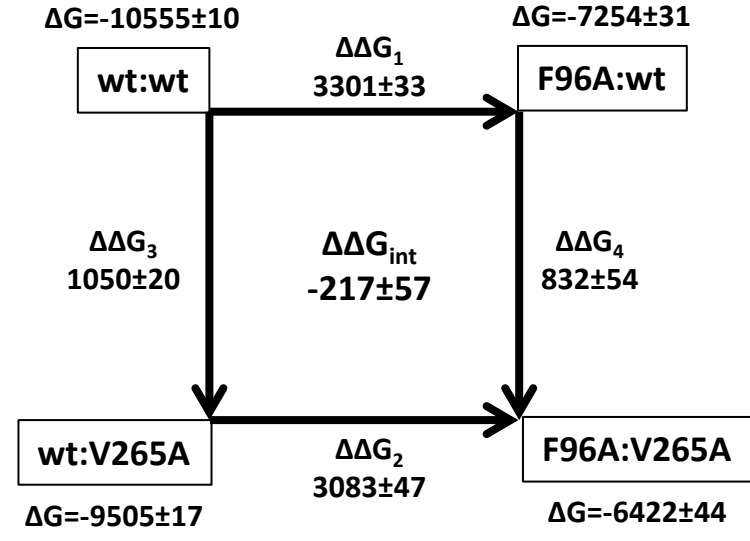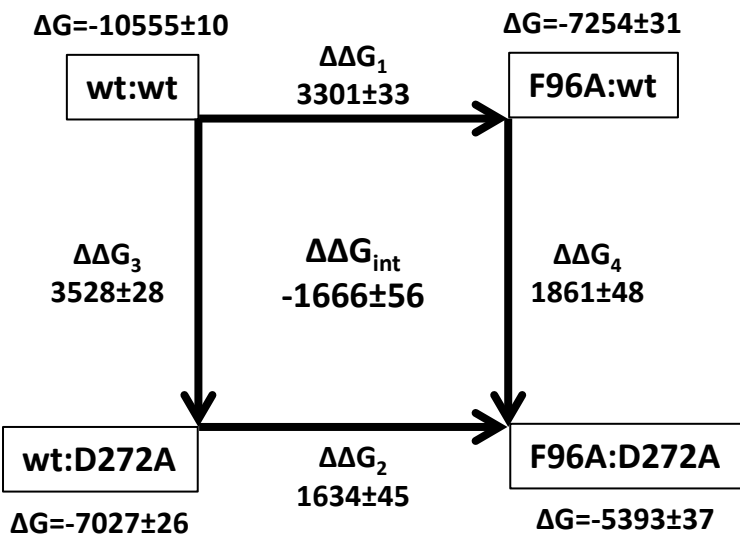

Supplement: elife-25068-fig4-data1.pdf [file elife-25068-fig4-data1.pdf]
